# Supplementary material for: Candidate inflammatory biomarkers display unique relationships with alpha-synuclein and correlate with measures of disease severity in subjects with Parkinson’s disease
Source: Springer Nature journal article supplement (doi:10.1186/s12974-017-0935-1), 2017-08-18
Supplement: MOESM1 [file 12974_2017_935_MOESM1_ESM.pdf]

**Supplementary Table 1. Regression analysis of each serum and CSF analyte across time for each individual (within subjects comparison across time; top) and the means and standard error of the mean for each analyte across the day (bottom).**

| Analyte | Serum |              |              |              |              |              | CSF          |              |              |              |       |              |              |              |              |
|---------|-------|--------------|--------------|--------------|--------------|--------------|--------------|--------------|--------------|--------------|-------|--------------|--------------|--------------|--------------|
|         | CRP   | IFN $\gamma$ | IL-6         | IL-8         | NGAL         | TNF          | CRP          | IFN $\gamma$ | IL-6         | IL-8         | NGAL  | TNF          | $\alpha$ Syn | A $\beta$ 40 | A $\beta$ 42 |
| HC +    | 33.3% | 0%           | 66.7%        | 0%           | 33.3%        | 0%           | 0%           | 83.3%        | 83.3%        | 16.7%        | 50%   | 0%           | 50%          | 66.7%        | 66.7%        |
| HC -    | 33.3% | 16.7%        | 0%           | 16.7%        | 16.7%        | 0%           | 33.3%        | 0%           | 0%           | 0%           | 0%    | 0%           | 16.7%        | 0%           | 0%           |
| HC 0    | 33.3% | <b>83.3%</b> | 33.3%        | <b>83.3%</b> | 50%          | <b>100%</b>  | <b>66.7%</b> | 16.7%        | 16.7%        | <b>83.3%</b> | 50%   | <b>100%</b>  | 33.3%        | 33.3%        | 33.3%        |
| PD +    | 33.3% | 0%           | 41.7%        | 25%          | 25%          | 0%           | 8.3%         | 41.7%        | 33.3%        | 16.7%        | 33.3% | 0%           | 75%          | 66.7%        | 58.3%        |
| PD -    | 25%   | 8.3%         | 0%           | 16.7%        | 8.3%         | 8.3%         | 50%          | 0%           | 0%           | 0%           | 16.7% | 8.3%         | 8.3%         | 0%           | 0%           |
| PD 0    | 41.7% | <b>91.7%</b> | <b>58.3%</b> | <b>58.3%</b> | <b>66.7%</b> | <b>91.7%</b> | 41.7%        | <b>58.3%</b> | <b>66.7%</b> | <b>83.3%</b> | 50%   | <b>91.7%</b> | 16.7%        | 33.3%        | 41.7%        |

| Condition:    |       | Healthy Controls |          |          |          |          |          |          |          |          |          |          |          | Parkinson's Disease |          |          |          |          |          |          |          |          |          |  |  |
|---------------|-------|------------------|----------|----------|----------|----------|----------|----------|----------|----------|----------|----------|----------|---------------------|----------|----------|----------|----------|----------|----------|----------|----------|----------|--|--|
| Serum Analyte | Hour: | 0                | 1        | 2        | 4        | 6        | 10       | 12       | 16       | 20       | 24       | 26       | 0        | 1                   | 2        | 4        | 6        | 10       | 12       | 16       | 20       | 24       | 26       |  |  |
| TNF           | Mean  | 2.73             | 2.70     | 2.67     | 2.71     | 2.70     | 2.78     | 2.71     | 2.76     | 2.70     | 2.84     | 2.83     | 1.81     | 1.74                | 1.77     | 1.71     | 1.79     | 1.73     | 1.70     | 1.85     | 1.75     | 1.74     | 1.78     |  |  |
|               | SEM   | 0.08             | 0.13     | 0.10     | 0.14     | 0.11     | 0.10     | 0.13     | 0.11     | 0.04     | 0.13     | 0.08     | 0.18     | 0.15                | 0.15     | 0.14     | 0.15     | 0.13     | 0.13     | 0.16     | 0.13     | 0.16     | 0.14     |  |  |
| IFN $\gamma$  | Mean  | 5.49             | 5.28     | 5.03     | 4.64     | 4.96     | 5.28     | 5.47     | 5.68     | 5.39     | 4.72     | 4.62     | 5.25     | 4.66                | 4.33     | 3.90     | 3.74     | 3.56     | 3.62     | 3.94     | 3.57     | 3.25     | 3.00     |  |  |
|               | SEM   | 0.84             | 0.95     | 0.76     | 0.50     | 0.62     | 0.49     | 0.64     | 0.98     | 0.76     | 0.69     | 0.73     | 1.75     | 1.31                | 1.20     | 1.01     | 0.81     | 0.53     | 0.52     | 0.62     | 0.51     | 0.44     | 0.38     |  |  |
| NGAL          | Mean  | 1.46E+05         | 1.48E+05 | 1.47E+05 | 1.54E+05 | 1.60E+05 | 1.66E+05 | 2.26E+05 | 1.64E+05 | 1.64E+05 | 1.56E+05 | 1.59E+05 | 2.09E+05 | 1.96E+05            | 2.13E+05 | 2.05E+05 | 2.10E+05 | 2.22E+05 | 2.15E+05 | 2.15E+05 | 1.93E+05 | 2.06E+05 | 2.17E+05 |  |  |
|               | SEM   | 1.08E+04         | 1.06E+04 | 8.95E+03 | 7.22E+03 | 1.07E+04 | 1.31E+04 | 6.96E+04 | 1.71E+04 | 2.18E+04 | 1.72E+04 | 2.29E+04 | 1.54E+04 | 1.51E+04            | 1.55E+04 | 1.67E+04 | 1.17E+04 | 1.90E+04 | 1.52E+04 | 1.79E+04 | 2.26E+04 | 2.26E+04 | 1.53E+04 |  |  |
| CRP           | Mean  | 1.56E+06         | 1.53E+06 | 1.53E+06 | 1.50E+06 | 1.57E+06 | 1.56E+06 | 1.46E+06 | 1.45E+06 | 1.47E+06 | 1.52E+06 | 1.54E+06 | 1.45E+06 | 1.36E+06            | 1.44E+06 | 1.37E+06 | 1.38E+06 | 1.41E+06 | 1.37E+06 | 1.40E+06 | 1.33E+06 | 1.56E+06 | 1.73E+06 |  |  |
|               | SEM   | 4.78E+05         | 4.45E+05 | 4.47E+05 | 4.11E+05 | 4.60E+05 | 4.55E+05 | 4.24E+05 | 4.38E+05 | 4.47E+05 | 4.65E+05 | 4.51E+05 | 5.43E+05 | 4.75E+05            | 5.19E+05 | 4.93E+05 | 4.92E+05 | 4.65E+05 | 4.39E+05 | 4.08E+05 | 3.92E+05 | 4.25E+05 | 4.76E+05 |  |  |
| IL-6          | Mean  | 0.75             | 0.93     | 1.21     | 1.10     | 1.14     | 1.81     | 2.80     | 2.52     | 2.25     | 2.33     | 2.73     | 0.79     | 0.95                | 1.70     | 1.56     | 1.57     | 2.16     | 3.33     | 2.74     | 3.62     | 4.94     | 4.30     |  |  |
|               | SEM   | 0.13             | 0.20     | 0.20     | 0.25     | 0.26     | 0.32     | 0.44     | 1.54     | 0.80     | 0.88     | 1.07     | 0.09     | 0.12                | 0.42     | 0.28     | 0.35     | 0.55     | 0.74     | 0.58     | 0.73     | 1.67     | 0.97     |  |  |
| IL-8          | Mean  | 10.57            | 11.84    | 12.16    | 12.17    | 11.92    | 12.50    | 10.78    | 11.45    | 11.76    | 12.86    | 12.11    | 11.09    | 10.43               | 10.00    | 9.90     | 9.78     | 9.94     | 9.99     | 10.24    | 10.37    | 10.86    | 9.89     |  |  |
|               | SEM   | 1.48             | 1.87     | 1.96     | 1.83     | 1.67     | 1.55     | 1.44     | 1.81     | 1.62     | 2.39     | 2.18     | 2.34     | 2.58                | 2.60     | 2.56     | 2.38     | 2.09     | 2.49     | 2.11     | 2.18     | 2.29     | 2.11     |  |  |
| CSF Analyte   |       |                  |          |          |          |          |          |          |          |          |          |          |          |                     |          |          |          |          |          |          |          |          |          |  |  |
| TNF           | Mean  | 0.34             | 0.51     | 0.91     | 1.00     | 1.36     | 1.18     | 1.04     | 0.92     | 0.75     | 0.68     | 0.55     | 0.21     | 0.63                | 1.28     | 1.26     | 1.11     | 1.48     | 0.78     | 0.87     | 0.67     | 0.59     | 0.47     |  |  |
|               | SEM   | 0.10             | 0.08     | 0.18     | 0.19     | 0.29     | 0.17     | 0.37     | 0.25     | 0.17     | 0.12     | 0.07     | 0.03     | 0.08                | 0.26     | 0.24     | 0.18     | 0.45     | 0.14     | 0.18     | 0.13     | 0.09     | 0.07     |  |  |
| IFN $\gamma$  | Mean  | 0.38             | 0.37     | 0.30     | 0.65     | 0.21     | 1.58     | 1.96     | 1.91     | 3.12     | 2.92     | 2.90     | 0.21     | 0.28                | 0.17     | 0.11     | 0.17     | 0.37     | 0.40     | 2.47     | 3.16     | 5.21     | 3.45     |  |  |
|               | SEM   | 0.08             | 0.09     | 0.15     | 0.49     | 0.12     | 1.14     | 1.53     | 1.22     | 1.61     | 1.40     | 1.28     | 0.04     | 0.07                | 0.05     | 0.04     | 0.06     | 0.20     | 0.24     | 2.15     | 2.74     | 4.65     | 2.82     |  |  |
| NGAL          | Mean  | 1.95E+03         | 1.85E+03 | 1.92E+03 | 2.01E+03 | 1.89E+03 | 2.20E+03 | 1.99E+03 | 2.21E+03 | 2.38E+03 | 2.35E+03 | 2.33E+03 | 2.12E+03 | 2.12E+03            | 2.01E+03 | 2.00E+03 | 2.00E+03 | 2.15E+03 | 2.05E+03 | 2.38E+03 | 2.29E+03 | 2.35E+03 | 2.37E+03 |  |  |
|               | SEM   | 65.87            | 79.83    | 111.60   | 186.20   | 178.99   | 160.11   | 193.14   | 225.51   | 283.34   | 307.99   | 303.94   | 265.89   | 331.17              | 287.94   | 219.75   | 179.89   | 260.08   | 168.31   | 291.09   | 290.43   | 337.50   | 276.51   |  |  |
| CRP           | Mean  | 3.78E+03         | 3.49E+03 | 3.96E+03 | 4.51E+03 | 4.13E+03 | 4.24E+03 | 3.93E+03 | 3.77E+03 | 3.70E+03 | 3.54E+03 | 3.51E+03 | 3.76E+03 | 3.90E+03            | 3.65E+03 | 3.53E+03 | 3.32E+03 | 3.22E+03 | 3.06E+03 | 2.95E+03 | 2.93E+03 | 3.14E+03 | 3.59E+03 |  |  |
|               | SEM   | 1.29E+03         | 1.20E+03 | 1.46E+03 | 1.74E+03 | 1.59E+03 | 1.53E+03 | 1.47E+03 | 1.28E+03 | 1.21E+03 | 1.18E+03 | 1.18E+03 | 1.28E+03 | 1.46E+03            | 1.37E+03 | 1.37E+03 | 1.33E+03 | 1.35E+03 | 1.29E+03 | 1.07E+03 | 1.20E+03 | 1.36E+03 | 1.74E+03 |  |  |
| IL-6          | Mean  | 1.83             | 2.70     | 4.58     | 8.91     | 11.11    | 16.30    | 14.20    | 17.58    | 19.50    | 15.75    | 13.93    | 1.93     | 2.24                | 3.55     | 10.09    | 17.74    | 27.27    | 15.86    | 21.00    | 16.31    | 12.24    | 10.14    |  |  |
|               | SEM   | 0.68             | 1.42     | 1.75     | 1.90     | 1.89     | 3.37     | 3.18     | 3.72     | 4.49     | 3.30     | 2.77     | 0.28     | 0.32                | 0.85     | 3.46     | 8.07     | 16.60    | 6.33     | 9.43     | 7.45     | 5.01     | 3.31     |  |  |
| IL-8          | Mean  | 41.61            | 43.69    | 115.18   | 450.78   | 1517.26  | 7985.04  | 2759.34  | 923.85   | 579.63   | 344.84   | 294.47   | 38.35    | 43.05               | 74.56    | 298.81   | 516.52   | 529.46   | 376.91   | 316.62   | 246.08   | 159.24   | 159.24   |  |  |
|               | SEM   | 3.69             | 4.94     | 26.41    | 100.15   | 973.42   | 7334.99  | 2224.01  | 508.90   | 240.71   | 99.96    | 92.56    | 3.30     | 4.40                | 9.18     | 57.05    | 138.52   | 156.65   | 116.69   | 105.43   | 80.28    | 32.70    | 29.68    |  |  |
| $\alpha$ Syn  | Mean  | 1.54E+03         | 1.60E+03 | 1.69E+03 | 2.05E+03 | 1.94E+03 | 1.97E+03 | 2.04E+03 | 2.15E+03 | 2.10E+03 | 2.34E+03 | 2.31E+03 | 1.14E+03 | 1.14E+03            | 1.23E+03 | 1.40E+03 | 1.53E+03 | 1.69E+03 | 1.81E+03 | 1.93E+03 | 2.00E+03 | 2.17E+03 | 2.23E+03 |  |  |
|               | SEM   | 168.02           | 168.76   | 178.25   | 336.96   | 263.38   | 234.82   | 216.65   | 255.17   | 231.12   | 510.44   | 517.45   | 118.97   | 92.45               | 113.63   | 130.80   | 153.88   | 180.62   | 216.23   | 243.78   | 260.97   | 296.95   | 304.77   |  |  |
| A $\beta$ 40  | Mean  | 5.03E+03         | 5.27E+03 | 5.82E+03 | 6.11E+03 | 6.29E+03 | 6.73E+03 | 6.93E+03 | 7.49E+03 | 7.51E+03 | 7.24E+03 | 7.11E+03 | 3.75E+03 | 4.14E+03            | 4.22E+03 | 4.71E+03 | 4.98E+03 | 5.57E+03 | 5.94E+03 | 6.26E+03 | 6.51E+03 | 6.54E+03 | 6.78E+03 |  |  |
|               | SEM   | 595.87           | 554.70   | 541.30   | 646.01   | 535.53   | 619.72   | 493.56   | 735.43   | 744.94   | 709.58   | 736.16   | 316.54   | 292.70              | 355.82   | 359.07   | 448.29   | 524.20   | 575.86   | 716.46   | 806.80   | 847.75   | 853.09   |  |  |
| A $\beta$ 42  | Mean  | 1.35E+03         | 1.42E+03 | 1.57E+03 | 1.62E+03 | 1.64E+03 | 1.71E+03 | 1.75E+03 | 1.91E+03 | 1.87E+03 | 1.86E+03 | 1.79E+03 | 8.70E+02 | 1.09E+03            | 1.10E+03 | 1.26E+03 | 1.40E+03 | 1.50E+03 | 1.62E+03 | 1.70E+03 | 1.76E+03 | 1.83E+03 | 1.87E+03 |  |  |
|               | SEM   | 218.91           | 233.44   | 236.04   | 255.02   | 220.36   | 220.27   | 198.21   | 237.37   | 175.22   | 204.57   | 220.66   | 77.47    | 125.32              | 122.03   | 152.75   | 179.92   | 199.10   | 220.05   | 246.99   | 299.47   | 320.83   | 308.10   |  |  |

The most stable analytes across time in a majority of HC and PD subjects were serum IFN $\gamma$ , IL-8, & TNF and CSF IL-8, & TNF. Values denote the percentage of individuals per group (HC; n=6, PD; n=12) that display a significantly positive (+), negative (-), or no association ( $\theta$ ; i.e., were stable) across time. Analytes that are  $\geq 51\%$  stable ( $\theta$ ) are in bold (top). All analytes are presented as the mean pg/ml and SEM for healthy control and Parkinson's disease subjects across the day (bottom).
