# Supplementary material for: Candidate inflammatory biomarkers display unique relationships with alpha-synuclein and correlate with measures of disease severity in subjects with Parkinson’s disease
Source: Springer Nature journal article supplement (doi:10.1186/s12974-017-0935-1), 2017-08-18
Supplement: MOESM2 [file 12974_2017_935_MOESM2_ESM.pdf]

**Supplementary Table 2. Serum TNF and NGAL are significantly different between PD and HC at Time 0.**

| Serum Analyte | Median (pg/ml) |         | Sum of Ranks |     | Mann-Whitney U | p value |
|---------------|----------------|---------|--------------|-----|----------------|---------|
|               | HC             | PD      | HC           | PD  |                |         |
| TNF           | 2.72           | 1.66    | 83           | 88  | 10             | 0.01    |
| IFN $\gamma$  | 5.34           | 3.60    | 70           | 101 | 23             | 0.25    |
| NGAL          | 140572         | 208101  | 31           | 140 | 10             | 0.01    |
| CRP           | 1245249        | 1101193 | 62           | 109 | 31             | 0.68    |
| IL-6          | 0.69           | 0.89    | 51           | 120 | 30             | 0.62    |
| IL-8          | 10.90          | 9.26    | 65           | 106 | 28             | 0.49    |
| CSF Analyte   |                |         |              |     |                |         |
| TNF           | 0.28           | 0.23    | 68           | 103 | 25             | 0.34    |
| IFN $\gamma$  | 0.41           | 0.17    | 76           | 95  | 17             | 0.08    |
| NGAL          | 1939           | 1933    | 79           | 221 | 50             | 0.81    |
| CRP           | 3145           | 2266    | 60           | 111 | 33             | 0.82    |
| IL-6          | 1.37           | 1.76    | 45           | 126 | 24             | 0.29    |
| IL-8          | 40.27          | 36.75   | 65           | 106 | 28             | 0.49    |

Mann-Whitney U Sum of Ranks non-parametric tests determined that serum TNF and serum NGAL were the only inflammatory proteins that differed between PD and HC.
