# Supplementary material for: Candidate inflammatory biomarkers display unique relationships with alpha-synuclein and correlate with measures of disease severity in subjects with Parkinson’s disease
Source: Springer Nature journal article supplement (doi:10.1186/s12974-017-0935-1), 2017-08-18
Supplement: MOESM3 [file 12974_2017_935_MOESM3_ESM.pdf]

**Supplementary Table 3. Serum TNF, IFN $\gamma$ , and NGAL are significantly different between PD and HC and demonstrate minimal variability across a 24-hour period.**

|                         | Serum                                                                                              |         |                            |                    |                            |         | CSF                    |                           |                            |                           |                             |         |  |
|-------------------------|----------------------------------------------------------------------------------------------------|---------|----------------------------|--------------------|----------------------------|---------|------------------------|---------------------------|----------------------------|---------------------------|-----------------------------|---------|--|
|                         | Condition<br>df = 1,16                                                                             |         | Time of Day<br>df = 10,160 |                    | Interaction<br>df = 10,160 |         | Condition<br>df = 1,16 |                           | Time of Day<br>df = 10,154 |                           | Interaction<br>df = 10, 154 |         |  |
|                         | F stat                                                                                             | p value | F stat                     | p value            | F stat                     | p value | F stat                 | p value                   | F stat                     | p value                   | F stat                      | p value |  |
| TNF                     | 208.58                                                                                             | <0.0001 | 0.11                       | 1.00               | 0.09                       | 1.00    | 0.01                   | 0.93                      | 4.66                       | <0.0001 <sup>2</sup>      | 0.40                        | 0.95    |  |
| IFN $\gamma$            | 8.49                                                                                               | 0.009   | 0.38                       | 0.95               | 0.16                       | 1.00    | 0.00                   | 0.98                      | 1.09                       | 0.37                      | 0.14                        | 1.00    |  |
| NGAL                    | 25.98                                                                                              | <0.0001 | 0.73                       | 0.69               | 0.50                       | 0.89    | 0.33                   | 0.58                      | 0.70                       | 0.73                      | 0.07                        | 1.00    |  |
| CRP                     | 0.13                                                                                               | 0.72    | 0.03                       | 1.00               | 0.02                       | 1.00    | 0.60                   | 0.45                      | 0.04                       | 1.00                      | 0.05                        | 1.00    |  |
| IL-6                    | 4.23                                                                                               | 0.06    | 3.12                       | 0.001 <sup>1</sup> | 0.45                       | 0.92    | 0.13                   | 0.72                      | 1.85                       | 0.06                      | 0.20                        | 1.00    |  |
| IL-8                    | 2.18                                                                                               | 0.16    | 0.04                       | 1.00               | 0.06                       | 0.99    | 5.08                   | 0.04                      | 2.23                       | 0.01 <sup>3</sup>         | 1.79                        | 0.07    |  |
|                         | Serum $\alpha$ synuclein, A $\beta$ <sub>40</sub> , and A $\beta$ <sub>42</sub> were not collected |         |                            |                    |                            |         | Condition<br>df = 1,16 | Time of Day<br>df = 1,160 |                            | Interaction<br>df = 1,160 |                             |         |  |
| $\alpha$ Syn            | X                                                                                                  | X       | X                          | X                  | X                          | X       | 8.35                   | 0.01                      | 3.30                       | 0.0007 <sup>4</sup>       | 0.24                        | 0.99    |  |
| A $\beta$ <sub>40</sub> | X                                                                                                  | X       | X                          | X                  | X                          | X       | 14.69                  | 0.001                     | 4.11                       | <0.0001 <sup>4</sup>      | 0.13                        | 1.00    |  |
| A $\beta$ <sub>42</sub> | X                                                                                                  | X       | X                          | X                  | X                          | X       | 4.61                   | 0.05                      | 2.15                       | 0.02 <sup>5</sup>         | 0.26                        | 0.99    |  |

Two-way repeated measures analysis of variance by time and condition (HC and PD) for each serum and CSF analyte revealed that serum TNF, IFN $\gamma$ , and NGAL differ between HC and PD across the day. Superscripts indicate the hour of the day where significant differences occur; 1 = 0 through 10th sampling hour, 2 = 6th and 10th sampling hour, 3 = 10th sampling hour, 4 = 0 through 6th sampling hour, and 5 = 0 through 4th sampling hour. X indicates that samples were not collected or analyzed.
