# Supplementary material for: Candidate inflammatory biomarkers display unique relationships with alpha-synuclein and correlate with measures of disease severity in subjects with Parkinson’s disease
Source: Springer Nature journal article supplement (doi:10.1186/s12974-017-0935-1), 2017-08-18
Supplement: MOESM4 [file 12974_2017_935_MOESM4_ESM.pdf]

**Supplementary Table 4. Repeated measures ANCOVA adjusted for time revealed several unique relationships between serum and CSF inflammation that are different between HC and PD subjects.**

| Serum Analyte | Condition<br>df = 1,16 |         | Covariate (CSF Analyte)<br>df = 1,172 |          | Interaction<br>df = 1,172 |         |
|---------------|------------------------|---------|---------------------------------------|----------|---------------------------|---------|
|               | F stat                 | p value | F stat                                | p value  | F stat                    | p value |
| TNF           | 76.68                  | <0.0001 | 0.60                                  | 0.4      | 0.00                      | 1.0     |
| IFN $\gamma$  | 6.85                   | 0.02    | 0.09                                  | 0.8      | 0.11                      | 0.7     |
| NGAL          | 0.64                   | 0.4     | 8.65                                  | 0.004    | 0.54                      | 0.5     |
| CRP           | 2.34                   | 0.15    | 1318.62                               | < 0.0001 | 6.94                      | 0.009   |
| IL-6          | 13.11                  | 0.002   | 11.72                                 | 0.0007   | 10.79                     | 0.001   |
| IL-8          | 5.27                   | 0.04    | 0.21                                  | 0.6      | 0.46                      | 0.5     |

Serum CRP and CSF CRP significantly covary in one group but not the other. Serum IL-6 and CSF IL-6 have different relationships between the two groups. Serum NGAL and CSF NGAL have a significant relationship that is not different between the two groups. Serum IFN $\gamma$ , serum IL-8, and serum TNF do not covary with CSF analytes, but are different between PD and HC. Significant values are in dark font.
