# Supplementary material for: Candidate inflammatory biomarkers display unique relationships with alpha-synuclein and correlate with measures of disease severity in subjects with Parkinson’s disease
Source: Springer Nature journal article supplement (doi:10.1186/s12974-017-0935-1), 2017-08-18
Supplement: MOESM5 [file 12974_2017_935_MOESM5_ESM.pdf]

**Supplementary Table 5. Repeated measures ANOVA adjusted for time revealed several unique relationships between serum and CSF inflammation and established biomarkers of neurodegenerative disease between PD and HC groups.**

|               | $\alpha$ Syn           |         |                                         |         |                           |         | $A\beta_{40}$          |         |                                           |         |                           |         | $A\beta_{42}$          |         |                                           |         |                           |         |
|---------------|------------------------|---------|-----------------------------------------|---------|---------------------------|---------|------------------------|---------|-------------------------------------------|---------|---------------------------|---------|------------------------|---------|-------------------------------------------|---------|---------------------------|---------|
|               | Condition<br>df = 1,16 |         | Covariate ( $\alpha$ Syn)<br>df = 1,172 |         | Interaction<br>df = 1,172 |         | Condition<br>df = 1,16 |         | Covariate ( $A\beta_{40}$ )<br>df = 1,172 |         | Interaction<br>df = 1,172 |         | Condition<br>df = 1,16 |         | Covariate ( $A\beta_{42}$ )<br>df = 1,172 |         | Interaction<br>df = 1,172 |         |
| Serum Analyte | F stat                 | p value | F stat                                  | p value | F stat                    | p value | F stat                 | p value | F stat                                    | p value | F stat                    | p value | F stat                 | p value | F stat                                    | p value | F stat                    | p value |
| TNF           | 44.66                  | <0.0001 | 2.84                                    | 0.09    | 1.02                      | 0.3     | 33.69                  | <0.0001 | 1.25                                      | 0.3     | 2.65                      | 0.1     | 23.65                  | 0.0002  | 2.80                                      | 0.1     | 0.22                      | 0.6     |
| IFN $\gamma$  | 1.09                   | 0.3     | 14.34                                   | 0.0002  | 7.04                      | 0.009   | 0.73                   | 0.4     | 9.37                                      | 0.003   | 4.29                      | 0.04    | 0.84                   | 0.4     | 0.31                                      | 0.6     | 4.31                      | 0.04    |
| NGAL          | 26.72                  | <0.0001 | 0.40                                    | 0.5     | 11.58                     | 0.0008  | 19.34                  | 0.0004  | 0.01                                      | 0.9     | 9.67                      | 0.002   | 2.20                   | 0.2     | 2.56                                      | 0.1     | 0.08                      | 0.8     |
| CRP           | 10.05                  | 0.006   | 5.34                                    | 0.02    | 12.8                      | 0.0004  | 7.02                   | 0.02    | 14.86                                     | 0.0002  | 7.55                      | 0.007   | 21.93                  | 0.0002  | 14.34                                     | 0.0002  | 26.66                     | <0.0001 |
| IL-6          | 1.36                   | 0.3     | 2.35                                    | 0.1     | 3.54                      | 0.06    | 0.81                   | 0.4     | 1.71                                      | 0.2     | 1.92                      | 0.2     | 0.18                   | 0.7     | 1.90                                      | 0.2     | 1.05                      | 0.3     |
| IL-8          | 0.17                   | 0.7     | 5.67                                    | 0.02    | 1.02                      | 0.3     | 0.80                   | 0.4     | 0.41                                      | 0.5     | 3.87                      | 0.05    | 0.09                   | 0.8     | 0.20                                      | 0.7     | 2.28                      | 0.1     |
| CSF Analyte   | F stat                 | p value | F stat                                  | p value | F stat                    | p value | F stat                 | p value | F stat                                    | p value | F stat                    | p value | F stat                 | p value | F stat                                    | p value | F stat                    | p value |
| TNF           | 9.65                   | 0.007   | 1.06                                    | 0.3     | 12.60                     | 0.0005  | 12.72                  | 0.003   | 0.02                                      | 0.9     | 15.39                     | 0.0001  | 14.89                  | 0.001   | 6.96                                      | 0.009   | 16.98                     | <0.0001 |
| IFN $\gamma$  | 0.06                   | 1.0     | 15.58                                   | 0.0001  | 0.11                      | 0.7     | 1.13                   | 0.3     | 12.25                                     | 0.0006  | 0.80                      | 0.4     | 0.46                   | 0.5     | 43.16                                     | <0.0001 | 1.19                      | 0.3     |
| NGAL          | 0.99                   | 0.3     | 0.24                                    | 0.6     | 0.71                      | 0.4     | 4.61                   | 0.05    | 3.48                                      | 0.06    | 4.07                      | 0.05    | 4.49                   | 0.05    | 6.47                                      | 0.01    | 3.92                      | 0.05    |
| CRP           | 7.53                   | 0.01    | 7.31                                    | 0.008   | 10.03                     | 0.002   | 5.93                   | 0.03    | 18.67                                     | <0.0001 | 6.50                      | 0.01    | 22.68                  | 0.0002  | 16.75                                     | <0.0001 | 28.26                     | <0.0001 |
| IL-6          | 0.74                   | 0.4     | 2.06                                    | 0.2     | 1.38                      | 0.2     | 0.01                   | 0.9     | 2.90                                      | 0.09    | 0.11                      | 0.7     | 5.50                   | 0.03    | 10.44                                     | 0.002   | 8.33                      | 0.004   |
| IL-8          | 0.02                   | 0.9     | 0.12                                    | 0.7     | 0.51                      | 0.5     | 1.74                   | 0.2     | 2.67                                      | 0.1     | 3.83                      | 0.05    | 9.41                   | 0.007   | 14.40                                     | 0.0002  | 15.97                     | <0.0001 |

With respect to CSF  $\alpha$  synuclein, HC and PD subjects have different relationships between this biomarker and serum IFN $\gamma$ , serum NGAL, serum CRP, CSF TNF, and CSF CRP. Serum IL-8 and CSF IFN $\gamma$  significantly covary with  $\alpha$  synuclein, but the relationships do not differ between groups (PD and HC). With respect to CSF  $A\beta_{40}$ , HC and PD subjects have different relationships between this biomarker and serum IFN $\gamma$ , serum NGAL, serum CRP, serum IL-8, CSF TNF, CSF NGAL, CSF CRP, and CSF IL-8. CSF IFN $\gamma$  covaries with  $A\beta_{40}$ , but the relationships do not differ between PD and HC subjects. With respect to  $A\beta_{42}$ , HC and PD subjects have different relationships between this biomarker and serum IFN $\gamma$ , serum CRP, CSF TNF, CSF NGAL, CSF CRP, CSF IL-6, and CSF IL-8. CSF IFN $\gamma$  covaries with  $A\beta_{42}$ , but the relationship does not differ between PD and HC subjects.
