# Supplementary material for: Candidate inflammatory biomarkers display unique relationships with alpha-synuclein and correlate with measures of disease severity in subjects with Parkinson’s disease
Source: Springer Nature journal article supplement (doi:10.1186/s12974-017-0935-1), 2017-08-18
Supplement: MOESM6 [file 12974_2017_935_MOESM6_ESM.pdf]

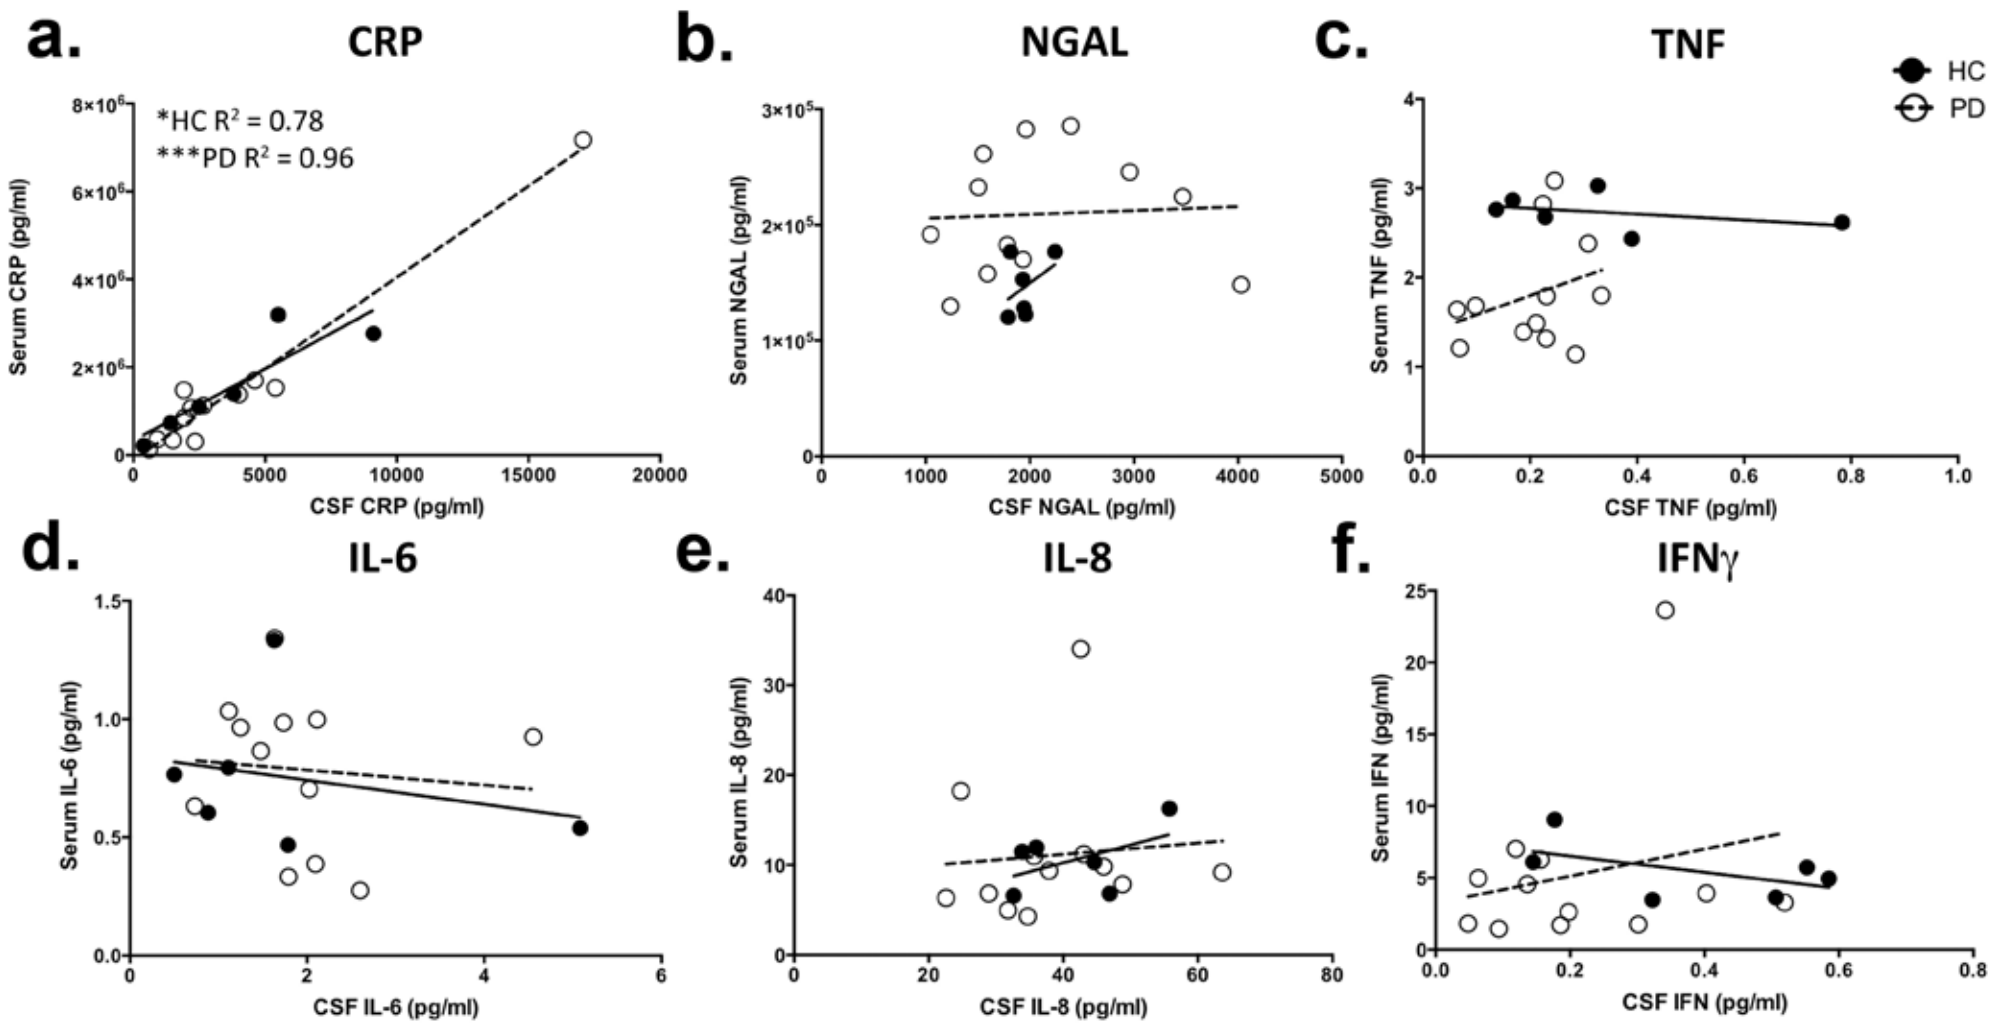

Supplementary Figure 1
