# Supplementary material for: Candidate inflammatory biomarkers display unique relationships with alpha-synuclein and correlate with measures of disease severity in subjects with Parkinson’s disease
Source: Springer Nature journal article supplement (doi:10.1186/s12974-017-0935-1), 2017-08-18
Supplement: MOESM7 [file 12974_2017_935_MOESM7_ESM.pdf]

**Supplementary Table 6. The relationship between the baseline (Time 0) expression of CNS proteins associated with neurodegenerative disease ( $\alpha$ -synuclein,  $A\beta_{40}$ , and  $A\beta_{42}$ ) and peripheral (serum) and central (CSF) inflammatory proteins between PD and HC groups.**

|               | $\alpha$ Syn         |                      |              |              |                                  |                                    | $A\beta_{40}$        |                      |              |              |                                  |                                   | $A\beta_{42}$  |                |       |       |                           |                            |
|---------------|----------------------|----------------------|--------------|--------------|----------------------------------|------------------------------------|----------------------|----------------------|--------------|--------------|----------------------------------|-----------------------------------|----------------|----------------|-------|-------|---------------------------|----------------------------|
|               | Slope                |                      | $R^2$        |              | ANOVA stats                      |                                    | Slope                |                      | $R^2$        |              | ANOVA stats                      |                                   | Slope          |                | $R^2$ |       | ANOVA stats               |                            |
| Serum Analyte | HC                   | PD                   | HC           | PD           | HC                               | PD                                 | HC                   | PD                   | HC           | PD           | HC                               | PD                                | HC             | PD             | HC    | PD    | HC                        | PD                         |
| TNF           | -0.000 ± 0.000       | -0.000 ± 0.000       | 0.069        | 0.147        | F (1,4) = 0.290; p = 0.62        | F (1,10) = 1.72; p = 0.22          | -0.000 ± 0.000       | -0.000 ± 0.000       | 0.013        | 0.029        | F (1,4) = 0.053; p = 0.83        | F (1,10) = 0.301; p = 0.60        | 0.000 ± 0.000  | -0.000 ± 0.001 | 0.005 | 0.165 | F (1,4) = 0.020; p = 0.90 | F (1,10) = 1.978; p = 0.19 |
| IFN $\gamma$  | -0.001 ± 0.002       | -0.007 ± 0.004       | 0.036        | 0.233        | F (1,4) = 0.150; p = 0.72        | F (1,10) = 3.045; p = 0.11         | -0.000 ± 0.001       | -0.003 ± 0.001       | 0.006        | 0.273        | F (1,4) = 0.024; p = 0.88        | F (1,10) = 3.760; p = 0.08        | 0.000 ± 0.002  | -0.007 ± 0.007 | 0.025 | 0.109 | F (1,4) = 0.102; p = 0.78 | F (1,10) = 1.217; p = 0.30 |
| NGAL          | 10.93 ± 31.56        | -2.607 ± 40.91       | 0.029        | 0.000        | F (1,4) = 0.120; p = 0.75        | F (1,10) = 0.004; p = 0.95         | -0.766 ± 9.024       | 2.707 ± 15.35        | 0.002        | 0.003        | F (1,4) = 0.007; p = 0.94        | F (1,10) = 0.031; p = 0.86        | -15.35 ± 23.36 | 42.73 ± 61.36  | 0.097 | 0.046 | F (1,4) = 0.432; p = 0.55 | F (1,10) = 0.485; p = 0.50 |
| CRP           | 1938 ± 1040          | -242.7 ± 1441        | 0.465        | 0.003        | F (1,4) = 3.471; p = 0.14        | F (1,10) = 0.028; p = 0.87         | <b>664.6 ± 224.1</b> | <b>632.5 ± 504.2</b> | <b>0.688</b> | 0.136        | <b>F (1,4) = 8.799; p = 0.04</b> | F (1,10) = 1.574; p = 0.24        | 1692 ± 688.8   | 542.3 ± 2210   | 0.601 | 0.006 | F (1,4) = 6.035; p = 0.07 | F (1,10) = 0.060; p = 0.81 |
| IL-6          | -0.000 ± 0.000       | -0.000 ± 0.000       | 0.166        | 0.022        | F (1,4) = 0.794; p = 0.42        | F (1,10) = 0.220; p = 0.65         | -0.000 ± 0.000       | -0.000 ± 0.000       | 0.052        | 0.000        | F (1,4) = 0.220; p = 0.66        | F (1,10) = 0.001; p = 0.97        | -0.000 ± 0.000 | -0.000 ± 0.000 | 0.006 | 0.001 | F (1,4) = 0.025; p = 0.88 | F (1,10) = 0.013; p = 0.91 |
| IL-8          | -0.001 ± 0.004       | -0.008 ± 0.006       | 0.005        | 0.164        | F (1,4) = 0.019; p = 0.90        | F (1,10) = 1.961; p = 0.19         | -0.001 ± 0.001       | -0.001 ± 0.001       | 0.115        | 0.039        | F (1,4) = 0.520; p = 0.51        | F (1,10) = 0.360; p = 0.56        | -0.004 ± 0.003 | -0.013 ± 0.009 | 0.349 | 0.191 | F (1,4) = 2.142; p = 0.22 | F (1,10) = 2.355; p = 0.16 |
| CSF Analyte   | HC                   | PD                   | HC           | PD           | HC                               | PD                                 | HC                   | PD                   | HC           | PD           | HC                               | PD                                | HC             | PD             | HC    | PD    | HC                        | PD                         |
| TNF           | 0.000 ± 0.000        | -0.000 ± 0.000       | 0.047        | 0.006        | F (1,4) = 0.197; p = 0.68        | F (1,10) = 0.058; p = 0.82         | -0.000 ± 0.000       | 0.000 ± 0.000        | 0.004        | 0.046        | F (1,4) = 0.015; p = 0.91        | F (1,10) = 0.486; p = 0.50        | -0.000 ± 0.000 | 0.000 ± 0.000  | 0.096 | 0.245 | F (1,4) = 0.426; p = 0.55 | F (1,10) = 3.241; p = 0.10 |
| IFN $\gamma$  | <b>0.000 ± 0.983</b> | -0.000 ± 0.000       | <b>0.825</b> | 0.088        | <b>F (1,4) = 18.88; p = 0.01</b> | F (1,10) = 0.966; p = 0.35         | 0.000 ± 0.000        | 0.000 ± 0.000        | 0.617        | 0.023        | F (1,4) = 6.444; p = 0.06        | F (1,10) = 0.235; p = 0.64        | 0.000 ± 0.000  | 0.000 ± 0.000  | 0.254 | 0.000 | F (1,4) = 1.306; p = 0.31 | F (1,10) = 0.001; p = 0.98 |
| NGAL          | 0.012 ± 0.196        | <b>1.642 ± 0.480</b> | 0.001        | <b>0.540</b> | F (1,4) = 0.004; p = 0.95        | <b>F (1,10) = 11.73; p = 0.007</b> | -0.029 ± 0.053       | <b>0.511 ± 0.211</b> | 0.068        | <b>0.369</b> | F (1,4) = 0.292; p = 0.62        | <b>F (1,10) = 5.858; p = 0.04</b> | -0.154 ± 0.129 | 0.977 ± 1.04   | 0.262 | 0.081 | F (1,4) = 1.419; p = 0.30 | F (1,10) = 0.881; p = 0.37 |
| CRP           | 5.085 ± 2.896        | 0.767 ± 3.396        | 0.435        | 0.005        | F (1,4) = 3.083; p = 0.15        | F (1,10) = 0.051; p = 0.83         | <b>1.775 ± 0.627</b> | 2.049 ± 1.103        | <b>0.668</b> | 0.256        | <b>F (1,4) = 8.029; p = 0.05</b> | F (1,10) = 3.448; p = 0.09        | 4.579 ± 1.872  | 2.659 ± 5.16   | 0.599 | 0.026 | F (1,4) = 5.980; p = 0.07 | F (1,10) = 0.266; p = 0.62 |
| IL-6          | 0.001 ± 0.002        | 0.000 ± 0.001        | 0.018        | 0.001        | F (1,4) = 0.075; p = 0.80        | F (1,10) = 0.097; p = 0.76         | -0.000 ± 0.001       | 0.000 ± 0.000        | 0.023        | 0.100        | F (1,4) = 0.094; p = 0.77        | F (1,10) = 1.11; p = 0.32         | -0.001 ± 0.001 | -0.001 ± 0.001 | 0.135 | 0.101 | F (1,4) = 0.624; p = 0.47 | F (1,10) = 1.125; p = 0.32 |
| IL-8          | 0.008 ± 0.010        | 0.005 ± 0.009        | 0.160        | 0.030        | F (1,4) = 0.730; p = 0.40        | F (1,10) = 0.310; p = 0.60         | 0.000 ± 0.003        | 0.004 ± 0.003        | 0.033        | 0.185        | F (1,4) = 0.140; p = 0.73        | F (1,10) = 2.270; p = 0.16        | -0.000 ± 0.008 | 0.007 ± 0.013  | 0.003 | 0.020 | F (1,4) = 0.01; p = 0.92  | F (1,10) = 0.240; p = 0.63 |

PD subjects demonstrate a relationship between CSF NGAL and CSF  $\alpha$ -synuclein as well as CSF NGAL and CSF  $A\beta_{40}$ , while HC subjects do not. HC subjects demonstrate a relationship between CSF IFN $\gamma$  and CSF  $\alpha$ -synuclein, CSF CRP and  $A\beta_{40}$ , and serum CRP and  $A\beta_{40}$ , while PD subjects do not. There were no other significant relationships at Time 0 (see Figure 3).
