# Supplementary material for: Candidate inflammatory biomarkers display unique relationships with alpha-synuclein and correlate with measures of disease severity in subjects with Parkinson’s disease
Source: Springer Nature journal article supplement (doi:10.1186/s12974-017-0935-1), 2017-08-18
Supplement: MOESM8 [file 12974_2017_935_MOESM8_ESM.pdf]

**Supplementary Table 7. CSF IFN $\gamma$  positively correlated with the Unified Parkinson's Disease Rating Score (UPDRS) components, and serum IL-8 positively correlated with Activities of Daily Living Score (ADLS) at Time 0 in PD subjects.**

|                      | UPDRS Total Score |              | Mentation, Behavior, & Mood |         | Activities of Daily Living |              | Motor Examination |         | Complication of Therapy |              | Years since diagnosis |         |
|----------------------|-------------------|--------------|-----------------------------|---------|----------------------------|--------------|-------------------|---------|-------------------------|--------------|-----------------------|---------|
|                      | R <sup>2</sup>    | p value      | R <sup>2</sup>              | p value | R <sup>2</sup>             | p value      | R <sup>2</sup>    | p value | R <sup>2</sup>          | p value      | R <sup>2</sup>        | p value |
| <b>Serum Analyte</b> |                   |              |                             |         |                            |              |                   |         |                         |              |                       |         |
| IL-6                 | 0.15              | 0.21         | 0.27                        | 0.08    | 0.05                       | 0.49         | 0.08              | 0.39    | 0.28                    | 0.08         | 0.03                  | 0.58    |
| IL-8                 | 0.26              | 0.09         | 0.02                        | 0.69    | <b>0.35</b>                | <b>0.04</b>  | 0.11              | 0.30    | 0.26                    | 0.09         | 0.03                  | 0.60    |
| IFN $\gamma$         | 0.005             | 0.82         | 0.01                        | 0.76    | 0.002                      | 0.90         | 0.03              | 0.56    | 0.003                   | 0.87         | 0.002                 | 0.89    |
| TNF                  | 0.08              | 0.37         | 0.05                        | 0.49    | 0.04                       | 0.52         | 0.12              | 0.26    | 0.04                    | 0.52         | 0.008                 | 0.78    |
| NGAL                 | 0.02              | 0.69         | 0.0002                      | 0.96    | 0.04                       | 0.52         | 0.01              | 0.74    | 0.08                    | 0.37         | 0.07                  | 0.41    |
| CRP                  | 0.008             | 0.79         | 0.0004                      | 0.95    | 0.07                       | 0.42         | 0.0008            | 0.93    | 0.008                   | 0.78         | 0.02                  | 0.67    |
| <b>CSF Analyte</b>   |                   |              |                             |         |                            |              |                   |         |                         |              |                       |         |
| IL-6                 | 0.02              | 0.66         | 0.08                        | 0.39    | 0.0002                     | 0.96         | 0.004             | 0.85    | 0.09                    | 0.35         | 0.16                  | 0.20    |
| IL-8                 | 0.05              | 0.49         | 0.06                        | 0.45    | 0.09                       | 0.35         | 0.04              | 0.51    | 0.0003                  | 0.96         | 0.003                 | 0.86    |
| IFN $\gamma$         | <b>0.57</b>       | <b>0.004</b> | 0.22                        | 0.12    | <b>0.60</b>                | <b>0.003</b> | 0.27              | 0.09    | <b>0.57</b>             | <b>0.005</b> | 0.03                  | 0.61    |
| TNF                  | 0.14              | 0.24         | 0.16                        | 0.20    | 0.15                       | 0.22         | 0.008             | 0.78    | 0.23                    | 0.11         | 0.00003               | 0.99    |
| NGAL                 | 0.02              | 0.64         | 0.004                       | 0.85    | 0.003                      | 0.86         | 0.02              | 0.69    | 0.17                    | 0.18         | 0.007                 | 0.80    |
| CRP                  | 0.007             | 0.79         | 0.0004                      | 0.95    | 0.05                       | 0.51         | 0.00006           | 0.98    | 0.0002                  | 0.97         | 0.01                  | 0.68    |
