# Supplementary material for: Candidate inflammatory biomarkers display unique relationships with alpha-synuclein and correlate with measures of disease severity in subjects with Parkinson’s disease
Source: Springer Nature journal article supplement (doi:10.1186/s12974-017-0935-1), 2017-08-18
Supplement: MOESM10 [file 12974_2017_935_MOESM10_ESM.pdf]

**Supplementary Table 8. Subject Demographics**

|           | <b>Age (years)</b> |       | <b>Weight (kg)</b> |       | <b>BMI (kg/m<sup>2</sup>)</b> |      | <b>Sex</b> | <b>Ethnicity</b>   |                        | <b>Race</b>               |       |       |
|-----------|--------------------|-------|--------------------|-------|-------------------------------|------|------------|--------------------|------------------------|---------------------------|-------|-------|
|           | Mean               | SD    | Mean               | SD    | Mean                          | SD   | Male       | Hispanic or Latino | Not Hispanic or Latino | Black or African American | Asian | White |
| <b>PD</b> | 51.8               | 7.96  | 82.43              | 16.05 | 26.53                         | 3.85 | 75%        | 0%                 | 100%                   | 0%                        | 0%    | 100%  |
| <b>HC</b> | 53.3               | 11.41 | 81.07              | 15.48 | 27.28                         | 2.94 | 66.7%      | 33.3%              | 66.7%                  | 16.67%                    | 33.3% | 50%   |
