# Supplementary material for: Candidate inflammatory biomarkers display unique relationships with alpha-synuclein and correlate with measures of disease severity in subjects with Parkinson’s disease
Source: Springer Nature journal article supplement (doi:10.1186/s12974-017-0935-1), 2017-08-18
Supplement: MOESM11 [file 12974_2017_935_MOESM11_ESM.pdf]

## Supplementary Table 9. Inclusion and Exclusion criteria summary

| PD | HC | Inclusion criterion                                                                                                                                               | PD | HC | Exclusion criterion                                                                                                                                                                                                    |
|----|----|-------------------------------------------------------------------------------------------------------------------------------------------------------------------|----|----|------------------------------------------------------------------------------------------------------------------------------------------------------------------------------------------------------------------------|
| ●  | ●  | ≥ 40 years of age                                                                                                                                                 | ●  | ●  | Current treatment with anti-coagulants                                                                                                                                                                                 |
| ●  | ●  | Body Mass Index (BMI) between 18-32 km/m <sup>2</sup>                                                                                                             | ●  | ●  | Use of investigational drugs or devices within 30 days or 5 half-lives (whichever is longer) before sample collection (dietary supplements taken outside of a clinical trial are not exclusionary; e.g., coenzyme Q10) |
| ●  | ●  | Weight of > 50 kg (110 lbs)                                                                                                                                       | ●  | ●  | Any medical assessment, condition, or circumstance making patient unsuitable for the study                                                                                                                             |
| ●  | ●  | Signed Informed Consent                                                                                                                                           | ●  | ●  | lower spinal malformations, local infection, or other spinal abnormality that would exclude lumbar puncture                                                                                                            |
| ●  |    | ≥ 30 years of age at time of PD diagnosis                                                                                                                         | ●  | ●  | History of febrile illness within 5 days of sample collection                                                                                                                                                          |
| ●  |    | Resting tremor, bradykinesia, rigidity (must have either resting tremor or bradykinesia)                                                                          | ●  | ●  | History of regular alcohol consumption exceeding 14 units/ week ( 1 unit = equivalent of 83 ml 12 % strength wine)                                                                                                     |
| ●  |    | PD for ≤ 10 years at screening                                                                                                                                    | ●  | ●  | Urine test positive for drugs of abuse or alcohol at screening and prior to sample collection                                                                                                                          |
| ●  |    | Hoehn Yahr stage I - III                                                                                                                                          | ●  | ●  | Pregnancy test positive                                                                                                                                                                                                |
| ●  |    | Taking PD medication including amantadine, DA agonists, L-DOPA, and/ or MAO-B inhibitors (must have been on a stable dose for 4 weeks prior to sample collection) | ●  | ●  | Use of prescription or non-prescription drugs, vitamins, or dietary supplement within 7 days or 5 half lives prior to sample collection deemed by the PI to interfere with the study                                   |
|    |    |                                                                                                                                                                   | ●  | ●  | Herbal supplements and hormonal contraception or replacement of any kind not discontinued 28 days prior to sample collection as deemed appropriate by the PI                                                           |
|    |    |                                                                                                                                                                   | ●  | ●  | Donated > 500 ml of blood within 5 days prior to sample collection                                                                                                                                                     |
|    |    |                                                                                                                                                                   | ●  | ●  | Positive for Hepatitis B, Hepatitis C, or HIV at screening                                                                                                                                                             |
|    |    |                                                                                                                                                                   | ●  | ●  | Strenuous exercise (> 5 hours / week running, swimming, or similar physical activity) within 72 hours prior to sample collection                                                                                       |
|    |    |                                                                                                                                                                   | ●  | ●  | Allergy to Lidocaine (xylocaine) or its derivatives                                                                                                                                                                    |
|    |    |                                                                                                                                                                   | ●  | ●  | Evidence or history of significant active bleeding or coagulation disorder                                                                                                                                             |
|    |    |                                                                                                                                                                   | ●  | ●  | Evidence or history of back pain or injury deemed clinically significant by PI                                                                                                                                         |
|    |    |                                                                                                                                                                   | ●  | ●  | Evidence or history of migraines deemed clinically significant by PI                                                                                                                                                   |
|    |    |                                                                                                                                                                   | ●  |    | Current or active clinically significant neurological disorder                                                                                                                                                         |
|    |    |                                                                                                                                                                   | ●  |    | First degree relative with idiopathic PD (parent, sibling, or child)                                                                                                                                                   |
|    |    |                                                                                                                                                                   | ●  |    | Currently taking DA agonists or other PD medications                                                                                                                                                                   |

Dots indicate use of criterion for subject inclusion or exclusion.
